# Supplementary material for: Harbor seal vibrissa morphology suppresses vortex-induced vibrations
Source: Oxford University Press journal article supplement (doi:10.1242/jeb.043216), 2010-07-16
Supplement: jeb043216figs1.pdf [file jeb043216figs1.pdf]

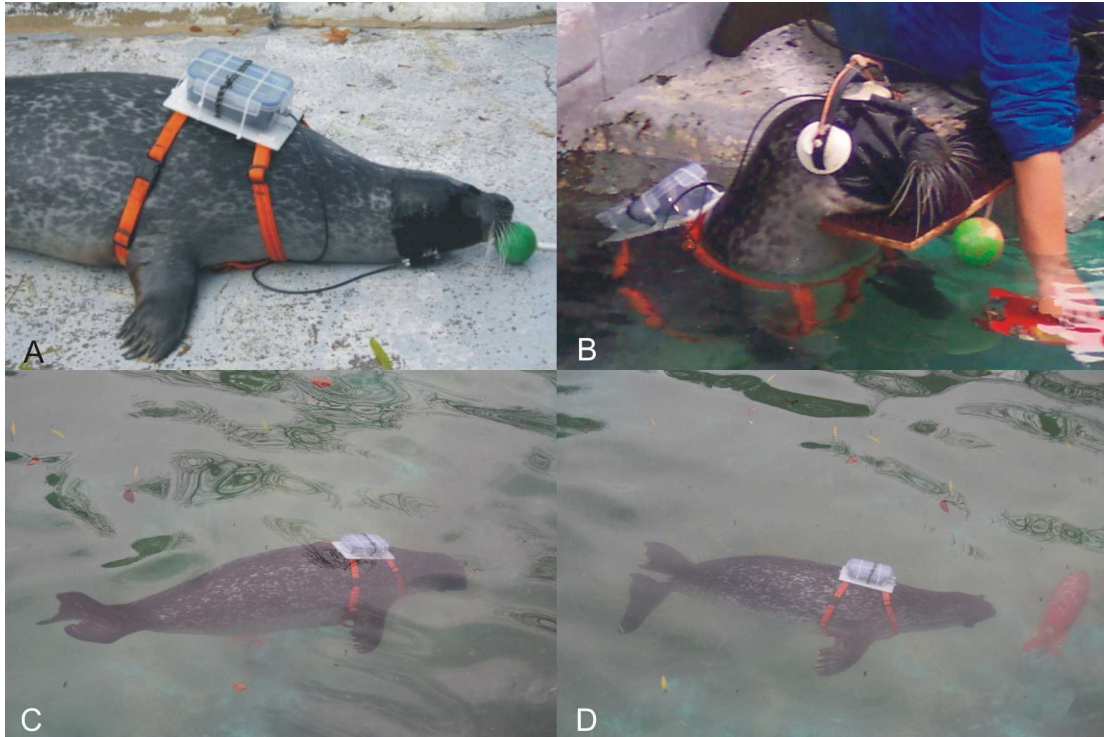

**Figure S1. Experimental procedure for the head-mounted camera recordings.** *A*, seal stationed on land wearing the eye-mask and the head-mounted camera (HMC) system. *B*, seal with HMC system stationed in the water waiting for the beginning of a trial. The seal's vibrissae are out of the water, and the seal is wearing headphones with pink noise in order to avoid secondary tactile and acoustic cues as long as the miniature submarine (red) is generating a hydrodynamic trail. *C*, seal with eye-mask and head-mounted camera system during hydrodynamic trail following. *D*, close to the completion of the task.
